# Supplementary material for: Ambient Exposure to Agricultural Pesticides during Pregnancy and Risk of Cerebral Palsy: A Population-Based Study in California
Source: Toxics. 2020 Jul 31;8(3):52. doi: 10.3390/toxics8030052 (PMC7560316; doi:10.3390/toxics8030052)
Supplement: Supplementary file 1 [file toxics-08-00052-s001.pdf]

# Supplementary Materials: Ambient Exposure to Agricultural Pesticides during Pregnancy and Risk of Cerebral Palsy: A Population-Based Study in California

Zeyan Liew, Ondine S. von Ehrenstein, Chenxiao Ling, Yuying Yuan, Qi Meng, Xin Cui,

Andrew S. Park, Peter Uldall, Jørn Olsen, Myles Cockburn and Beate Ritz

**Table S1.** The list of pesticides included in the study.

| Chemical Code <sup>1</sup> | Common Name               | Prevalence of Exposure during Pregnancy <sup>2</sup> | Potential Hormone Target Affected <sup>3</sup> | Chemical Class <sup>1</sup>  | Use Type <sup>1</sup>  |
|----------------------------|---------------------------|------------------------------------------------------|------------------------------------------------|------------------------------|------------------------|
| 253                        | Chlorpyrifos              | 35.0%                                                | Androgen                                       | Organophosphorus             | Insecticide            |
| 1685                       | Acephate                  | 29.8%                                                | Estrogen, Androgen, Thyroid                    | Organophosphorus             | Systemic insecticide   |
| 367                        | Malathion                 | 23.8%                                                | Thyroid                                        | Organophosphorus             | Insecticide, acaricide |
| 2245                       | Myclobutanil              | 22.1%                                                | Estrogen, Androgen                             | Azole                        | Fungicide              |
| 2081                       | Iprodione                 | 23.8%                                                | Estrogen                                       | Dicarboximide                | Fungicide              |
| 198                        | Diazinon                  | 22.8%                                                | Estrogen                                       | Organophosphorus             | Insecticide, acaricide |
| 2300                       | Bifenthrin                | 18.6%                                                | Androgen, Thyroid                              | Pyrethroid                   | Insecticide, acaricide |
| 2008                       | Permethrin                | 18.5%                                                | Estrogen                                       | Pyrethroid                   | Insecticide            |
| 211                        | Mancozeb                  | 15.3%                                                | Thyroid                                        | Dithiocarbamate, Inorganic-Z | Fungicide              |
| 216                        | Dimethoate                | 13.5%                                                | Estrogen, Thyroid                              | Organophosphorus             | Insecticide, acaricide |
| 2276                       | Propiconazole             | 14.0%                                                | Estrogen, Androgen                             | Azole                        | Fungicide              |
| 531                        | Simazine                  | 10.8%                                                | Estrogen                                       | Triazine                     | Herbicide              |
| 383                        | Methomyl                  | 11.0%                                                | Estrogen, Androgen                             | N-Methyl Carbamate           | Insecticide, acaricide |
| 105                        | Carbaryl                  | 9.9%                                                 | Estrogen                                       | N-Methyl Carbamate           | Insecticide            |
| 806                        | 2,4-D, Dimethylamine Salt | 9.9%                                                 | Androgen                                       | Chlorophenoxy acid or ester  | Herbicide              |
| 597                        | Trifluralin               | 10.1%                                                | Estrogen                                       | 2,6-Dinitroaniline           | Herbicide              |
| 2297                       | Lambda-Cyhalothrin        | 10.0%                                                | Thyroid                                        | Pyrethroid                   | Insecticide, acaricide |
| 231                        | Diuron                    | 9.3%                                                 | Androgen                                       | Urea                         | Herbicide              |
| 1980                       | Fenarimol                 | 8.4%                                                 | Estrogen, Androgen                             | Pyrimidine                   | Fungicide              |
| 2133                       | Triadimefon               | 8.1%                                                 | Estrogen, Androgen                             | Azole                        | Fungicide              |
| 369                        | Maneb                     | 8.9%                                                 | Thyroid                                        | Dithiocarbamate              | Fungicide              |
| 346                        | Dicofol                   | 6.1%                                                 | Estrogen, Androgen                             | Organochlorine               | Acaricide              |
| 1552                       | Benomyl                   | 6.7%                                                 | Estrogen                                       | Benzimidazole                | Fungicide              |

<sup>1</sup> Information from the PAN pesticide network [http://www.Pesticideinfo.Org/list\\_chemicals.Jsp](http://www.Pesticideinfo.Org/list_chemicals.Jsp). <sup>2</sup> Estimated from 39,377 births selected at random from the birth certificates records in the State of California, 1998-2010.

<sup>3</sup> Information synthesized from McKinlay et al. 2008. Endocrine disrupting pesticides: Implications for risk assessment. Environ Int 34:168-183.

**Table S2.** Odds Ratio (OR) and 95% confidence intervals (CI) for CP according to pregnancy exposures to the 23 pesticides compounds and suspected endocrine disruptors, adjusting for additional potential confounders.

| Timing of Exposure                   | Total Sample               |                            | Female Offspring           |                            | Male Offspring             |                            |
|--------------------------------------|----------------------------|----------------------------|----------------------------|----------------------------|----------------------------|----------------------------|
|                                      | OR <sup>1</sup> and 95% CI | OR <sup>2</sup> and 95% CI | OR <sup>3</sup> and 95% CI | OR <sup>4</sup> and 95% CI | OR <sup>3</sup> and 95% CI | OR <sup>4</sup> and 95% CI |
| Exposure to any of the 23 pesticides |                            |                            |                            |                            |                            |                            |
| During pregnancy                     |                            |                            |                            |                            |                            |                            |
| No                                   | Ref                        | Ref                        | Ref                        | Ref                        | Ref                        | Ref                        |
| Yes                                  | 1.06 (0.96, 1.17)          | 1.06 (0.95, 1.17)          | 1.09 (0.93, 1.28)          | 1.10 (0.94, 1.29)          | 1.04 (0.92, 1.19)          | 1.02 (0.90, 1.16)          |
| 1st trimester                        |                            |                            |                            |                            |                            |                            |
| No                                   | Ref                        | Ref                        | Ref                        | Ref                        | Ref                        | Ref                        |
| Yes                                  | 1.07 (0.99, 1.16)          | 1.05 (0.97, 1.14)          | 1.19 (1.05, 1.35)          | 1.19 (1.05, 1.36)          | 0.99 (0.89, 1.09)          | 0.96 (0.87, 1.07)          |
| 2nd trimester                        |                            |                            |                            |                            |                            |                            |
| No                                   | Ref                        | Ref                        | Ref                        | Ref                        | Ref                        | Ref                        |
| Yes                                  | 1.01 (0.93, 1.09)          | 1.01 (0.93, 1.09)          | 1.06 (0.94, 1.20)          | 1.07 (0.94, 1.22)          | 0.98 (0.88, 1.08)          | 0.97 (0.87, 1.07)          |
| 3rd trimester <sup>5</sup>           |                            |                            |                            |                            |                            |                            |
| No                                   | Ref                        | Ref                        | Ref                        | Ref                        | Ref                        | Ref                        |
| Yes                                  | 0.98 (0.91, 1.06)          | 0.98 (0.91, 1.07)          | 1.05 (0.93, 1.19)          | 1.06 (0.94, 1.20)          | 0.93 (0.84, 1.03)          | 0.93 (0.84, 1.03)          |

<sup>1</sup> Adjusted for child's sex, birth year, maternal age, maternal education, maternal race, maternal birthplace and DDS regional center; <sup>2</sup> Adjusted for child's sex, birth year, maternal age, maternal education, maternal race, maternal birthplace, DDS regional center, parity, neighborhood-level socioeconomic status, season of conception, payment source for prenatal care, prenatal care in the first trimester; <sup>3</sup> Adjusted for birth year, maternal age, maternal education, maternal race, maternal birthplace and DDS regional center; <sup>4</sup> Adjusted for birth year, maternal age, maternal education, maternal race, maternal birthplace, DDS regional center, parity, neighborhood-level socioeconomic status, season of conception, payment source for prenatal care, prenatal care in the first trimester; <sup>5</sup> subjects with gestational age <26 weeks were excluded in the assessment of 3rd trimester exposure.

**Table S3.** Distribution of the cumulative count of the 23 pesticides among the cases and the controls exposed.

| Timing of Exposure | Cumulative count of the 23 Pesticides among the Exposed |        |           |            |        |           |          |        |           |
|--------------------|---------------------------------------------------------|--------|-----------|------------|--------|-----------|----------|--------|-----------|
|                    | All Subjects                                            |        |           | Cases      |        |           | Controls |        |           |
|                    | N                                                       | Median | 25th–75th | Total<br>N | Median | 25th–75th | N        | Median | 25th–75th |
| During pregnancy   | 36,834                                                  | 5      | 2–9       | 3338       | 4      | 2–8       | 33,496   | 5      | 2–9       |
| 1st trimester      | 32,053                                                  | 3      | 2–7       | 2924       | 3      | 2–6       | 29,129   | 4      | 2–7       |
| 2nd trimester      | 32,015                                                  | 3      | 2–6       | 2885       | 3      | 1–6       | 29,130   | 3      | 2–7       |
| 3rd trimester      | 28,190                                                  | 3      | 2–6       | 2578       | 3      | 1–6       | 25,612   | 3      | 2–6       |
| Female offspring   |                                                         |        |           |            |        |           |          |        |           |
|                    | N                                                       | Median | 25th–75th | N          | Median | 25th–75th | N        | Median | 25th–75th |
| During pregnancy   | 15,863                                                  | 5      | 2–9       | 1438       | 4      | 2–8       | 14,425   | 5      | 2–9       |
| 1st trimester      | 13,786                                                  | 3      | 2–6       | 1286       | 3      | 2–6       | 12,500   | 4      | 2–7       |
| 2nd trimester      | 13,771                                                  | 3      | 2–6       | 1253       | 3      | 2–6       | 12,518   | 3      | 2–6       |
| 3rd trimester      | 12,235                                                  | 3      | 2–6       | 1141       | 3      | 2–6       | 11,094   | 3      | 2–6       |
| Male offspring     |                                                         |        |           |            |        |           |          |        |           |
|                    | N                                                       | Median | 25th–75th | N          | Median | 25th–75th | N        | Median | 25th–75th |
| During pregnancy   | 20,971                                                  | 5      | 2–9       | 1900       | 4      | 2–7       | 19,071   | 5      | 2–9       |
| 1st trimester      | 18,267                                                  | 3      | 2–7       | 1638       | 3      | 2–6       | 16,629   | 4      | 2–7       |
| 2nd trimester      | 18,244                                                  | 3      | 2–7       | 1632       | 3      | 1–6       | 16,612   | 3      | 2–7       |
| 3rd trimester      | 15,955                                                  | 3      | 2–6       | 1437       | 3      | 1–6       | 14,518   | 3      | 2–6       |

**Table S4.** Odds Ratio (OR) and 95% confidence interval (CI) for CP according to pregnancy exposures to the number (count) of the 23 pesticides compounds and suspected endocrine disruptors.

| Timing of Exposure                                        | Total Sample        |                          |                            | Female Offspring    |                          |                            | Male Offspring      |                          |                            |
|-----------------------------------------------------------|---------------------|--------------------------|----------------------------|---------------------|--------------------------|----------------------------|---------------------|--------------------------|----------------------------|
|                                                           | Cases<br>(N = 3905) | Controls<br>(N = 39,377) | OR <sup>1</sup> and 95% CI | Cases<br>(N = 1661) | Controls<br>(N = 16,924) | OR <sup>2</sup> and 95% CI | Cases<br>(N = 2244) | Controls<br>(N = 22,453) | OR <sup>2</sup> and 95% CI |
| Numbers (count) of the 23 pesticides exposed <sup>3</sup> |                     |                          |                            |                     |                          |                            |                     |                          |                            |
| During pregnancy                                          |                     |                          |                            |                     |                          |                            |                     |                          |                            |
| 0                                                         | 567                 | 5881                     | Ref                        | 223                 | 2499                     | Ref                        | 344                 | 3382                     | Ref                        |
| 1 to 5                                                    | 2020                | 18,854                   | 1.10 (0.99, 1.22)          | 854                 | 8185                     | 1.11 (0.95, 1.31)          | 1166                | 10,669                   | 1.10 (0.99, 1.22)          |
| >5                                                        | 1318                | 14,642                   | 1.00 (0.89, 1.11)          | 584                 | 6240                     | 1.05 (0.88, 1.25)          | 734                 | 8402                     | 0.99 (0.89, 1.11)          |
| 1st trimester                                             |                     |                          |                            |                     |                          |                            |                     |                          |                            |
| 0                                                         | 981                 | 10,248                   | Ref                        | 375                 | 4424                     | Ref                        | 606                 | 5824                     | Ref                        |
| 1 to 3                                                    | 1600                | 14,532                   | 1.14 (1.04, 1.24)          | 701                 | 6246                     | 1.27 (1.11, 1.46)          | 899                 | 8286                     | 1.14 (1.04, 1.24)          |
| >3                                                        | 1324                | 14,597                   | 0.98 (0.90, 1.08)          | 585                 | 6254                     | 1.09 (0.95, 1.27)          | 739                 | 8343                     | 0.98 (0.90, 1.08)          |
| 2nd trimester                                             |                     |                          |                            |                     |                          |                            |                     |                          |                            |
| 0                                                         | 1020                | 10,247                   | Ref                        | 408                 | 4406                     | Ref                        | 612                 | 5841                     | Ref                        |
| 1 to 3                                                    | 1564                | 14,707                   | 1.05 (0.96, 1.15)          | 652                 | 6356                     | 1.06 (0.93, 1.22)          | 912                 | 8351                     | 1.05 (0.96, 1.15)          |
| >3                                                        | 1321                | 14,423                   | 0.96 (0.87, 1.05)          | 601                 | 6162                     | 1.05 (0.91, 1.21)          | 720                 | 8261                     | 0.96 (0.87, 1.05)          |
| 3rd trimester <sup>4</sup>                                |                     |                          |                            |                     |                          |                            |                     |                          |                            |
| 0                                                         | 1149                | 11,092                   | Ref                        | 449                 | 4779                     | Ref                        | 700                 | 6313                     | Ref                        |
| 1 to 3                                                    | 1481                | 13,859                   | 1.02 (0.93, 1.10)          | 643                 | 6068                     | 1.07 (0.94, 1.23)          | 838                 | 7791                     | 1.01 (0.93, 1.10)          |
| >3                                                        | 1097                | 11,753                   | 0.93 (0.85, 1.02)          | 498                 | 5026                     | 1.03 (0.89, 1.19)          | 599                 | 6727                     | 0.93 (0.85, 1.02)          |

<sup>1</sup> Adjusted for child's sex, birth year, maternal age, maternal education, maternal race, maternal birthplace and DDS regional center; <sup>2</sup> Adjusted for birth year, maternal age, maternal education, maternal race, maternal birthplace and DDS regional center; <sup>3</sup> classified as none, =< median, > median based on the exposure distribution from all subjects; <sup>4</sup> Subjects with gestational age at birth < 26 weeks were excluded in the assessment of 3rd trimester exposure.

**Table S5.** Odds Ratio (OR) and 95% confidence interval (CI) for CP subtypes according to pregnancy exposures to the 23 selected pesticides compounds and suspected endocrine disruptors.

| Timing of Exposure                   | Spastic CP      |                            |                  |                            | Hypotonia CP    |                            |                 |                            | Other types <sup>2</sup> |                            |                 |                            |
|--------------------------------------|-----------------|----------------------------|------------------|----------------------------|-----------------|----------------------------|-----------------|----------------------------|--------------------------|----------------------------|-----------------|----------------------------|
|                                      | Female only     |                            | Male only        |                            | Female only     |                            | Male only       |                            | Female only              |                            | Male only       |                            |
|                                      | Cases (N = 932) | OR <sup>1</sup> and 95% CI | Cases (N = 1292) | OR <sup>1</sup> and 95% CI | Cases (N = 280) | OR <sup>1</sup> and 95% CI | Cases (N = 333) | OR <sup>1</sup> and 95 %CI | Cases (N = 430)          | OR <sup>1</sup> and 95% CI | Cases (N = 598) | OR <sup>1</sup> and 95% CI |
| Exposure to any of the 23 pesticides |                 |                            |                  |                            |                 |                            |                 |                            |                          |                            |                 |                            |
| During pregnancy                     |                 |                            |                  |                            |                 |                            |                 |                            |                          |                            |                 |                            |
| No                                   | 122             | Ref                        | 199              | Ref                        | 42              | Ref                        | 60              | Ref                        | 56                       | Ref                        | 82              | Ref                        |
| Yes                                  | 810             | 1.12 (0.91, 1.38)          | 1093             | 1.07 (0.91, 1.27)          | 238             | 0.96 (0.68, 1.37)          | 273             | 0.84 (0.63, 1.13)          | 374                      | 1.14 (0.84, 1.54)          | 516             | 1.13 (0.88, 1.44)          |
| 1st trimester                        |                 |                            |                  |                            |                 |                            |                 |                            |                          |                            |                 |                            |
| No                                   | 209             | Ref                        | 350              | Ref                        | 66              | Ref                        | 101             | Ref                        | 95                       | Ref                        | 148             | Ref                        |
| Yes                                  | 723             | 1.21 (1.02, 1.43)          | 942              | 1.01 (0.89, 1.16)          | 214             | 1.12 (0.84, 1.50)          | 232             | 0.83 (0.65, 1.06)          | 335                      | 1.23 (0.96, 1.58)          | 450             | 1.05 (0.86, 1.28)          |
| 2nd trimester                        |                 |                            |                  |                            |                 |                            |                 |                            |                          |                            |                 |                            |
| No                                   | 228             | Ref                        | 355              | Ref                        | 65              | Ref                        | 99              | Ref                        | 112                      | Ref                        | 151             | Ref                        |
| Yes                                  | 704             | 1.07 (0.91, 1.26)          | 937              | 0.99 (0.87, 1.13)          | 215             | 1.14 (0.85, 1.53)          | 234             | 0.87 (0.68, 1.12)          | 318                      | 0.96 (0.76, 1.22)          | 447             | 1.04 (0.85, 1.26)          |
| 3rd trimester <sup>3</sup>           |                 |                            |                  |                            |                 |                            |                 |                            |                          |                            |                 |                            |
| No                                   | 243             | Ref                        | 400              | Ref                        | 83              | Ref                        | 113             | Ref                        | 120                      | Ref                        | 181             | Ref                        |
| Yes                                  | 641             | 1.10 (0.93, 1.29)          | 827              | 0.95 (0.84, 1.09)          | 188             | 0.95 (0.72, 1.25)          | 208             | 0.84 (0.66, 1.07)          | 297                      | 1.02 (0.81, 1.28)          | 389             | 0.94 (0.78, 1.14)          |

<sup>1</sup> Adjusted for birth year, maternal age, maternal education, maternal race, maternal birthplace and DDS regional center; <sup>2</sup> Includes dyskinesia, ataxic, and unclassified; <sup>3</sup> subjects with gestational age <26 weeks were excluded in the assessment of 3rd trimester exposure.

**Table S6.** Odds Ratio (OR) and 95% confidence interval (CI) for unilateral or bilateral CP cases according to prenatal exposures to pesticides and suspected endocrine disruptors.

| Timing of Exposure                   | Unilateral CP      |                           |                    |                           | Bilateral CP        |                           |                     |                           |
|--------------------------------------|--------------------|---------------------------|--------------------|---------------------------|---------------------|---------------------------|---------------------|---------------------------|
|                                      | Female Only        |                           | Male Only          |                           | Female Only         |                           | Male Only           |                           |
|                                      | Cases<br>(N = 279) | OR <sup>1</sup> and 95%CI | Cases<br>(N = 325) | OR <sup>1</sup> and 95%CI | Cases<br>(N = 1175) | OR <sup>1</sup> and 95%CI | Cases<br>(N = 1606) | OR <sup>1</sup> and 95%CI |
| Exposure to any of the 23 pesticides |                    |                           |                    |                           |                     |                           |                     |                           |
| During pregnancy                     |                    |                           |                    |                           |                     |                           |                     |                           |
| No                                   | 34                 | Ref                       | 52                 | Ref                       | 163                 | Ref                       | 241                 | Ref                       |
| Yes                                  | 245                | 1.14 (0.78, 1.66)         | 273                | 0.96 (0.69, 1.32)         | 1012                | 1.06 (0.88, 1.27)         | 1365                | 1.07 (0.92, 1.24)         |
| 1st trimester                        |                    |                           |                    |                           |                     |                           |                     |                           |
| No                                   | 64                 | Ref                       | 89                 | Ref                       | 259                 | Ref                       | 428                 | Ref                       |
| Yes                                  | 215                | 1.11 (0.82, 1.49)         | 236                | 0.95 (0.73, 1.23)         | 916                 | 1.24 (1.07, 1.44)         | 1178                | 1.00 (0.89, 1.13)         |
| 2nd trimester                        |                    |                           |                    |                           |                     |                           |                     |                           |
| No                                   | 74                 | Ref                       | 86                 | Ref                       | 285                 | Ref                       | 433                 | Ref                       |
| Yes                                  | 205                | 0.90 (0.68, 1.20)         | 239                | 0.98 (0.75, 1.27)         | 890                 | 1.08 (0.93, 1.25)         | 1173                | 1.00 (0.88, 1.12)         |
| 3rd trimester <sup>2</sup>           |                    |                           |                    |                           |                     |                           |                     |                           |
| No                                   | 68                 | Ref                       | 107                | Ref                       | 322                 | Ref                       | 491                 | Ref                       |
| Yes                                  | 199                | 1.16 (0.87, 1.55)         | 202                | 0.81 (0.63, 1.04)         | 801                 | 1.03 (0.90, 1.19)         | 1040                | 0.95 (0.85, 1.07)         |

<sup>1</sup> Adjusted for birth year, maternal age, maternal education, maternal race, maternal birthplace and DDS regional center; <sup>2</sup> subjects with gestational age <26 weeks were excluded in the assessment of 3rd trimester exposure.

**Table S7.** Odds Ratio (OR) and 95% confidence interval (CI) for preterm and term CP cases according to prenatal exposures to pesticides and suspected endocrine disruptors.

| Timing of Exposure                   | Preterm CP         |                           |                    |                           | Term CP             |                           |                     |                           |
|--------------------------------------|--------------------|---------------------------|--------------------|---------------------------|---------------------|---------------------------|---------------------|---------------------------|
|                                      | Female only        |                           | Male only          |                           | Female only         |                           | Male only           |                           |
|                                      | Cases<br>(N = 429) | OR <sup>1</sup> and 95%CI | Cases<br>(N = 725) | OR <sup>1</sup> and 95%CI | Cases<br>(N = 1232) | OR <sup>1</sup> and 95%CI | Cases<br>(N = 1519) | OR <sup>1</sup> and 95%CI |
| Exposure to any of the 23 pesticides |                    |                           |                    |                           |                     |                           |                     |                           |
| During pregnancy                     |                    |                           |                    |                           |                     |                           |                     |                           |
| No                                   | 62                 | Ref                       | 102                | Ref                       | 161                 | Ref                       | 242                 | Ref                       |
| Yes                                  | 367                | 0.96 (0.72, 1.29)         | 623                | 1.11 (0.89, 1.38)         | 1071                | 1.14 (0.95, 1.37)         | 1277                | 1.01 (0.87, 1.18)         |
| 1st trimester                        |                    |                           |                    |                           |                     |                           |                     |                           |
| No                                   | 101                | Ref                       | 171                | Ref                       | 274                 | Ref                       | 435                 | Ref                       |
| Yes                                  | 328                | 1.08 (0.85, 1.37)         | 554                | 1.16 (0.96, 1.39)         | 958                 | 1.24 (1.07, 1.44)         | 1084                | 0.92 (0.81, 1.04)         |
| 2nd trimester                        |                    |                           |                    |                           |                     |                           |                     |                           |
| No                                   | 101                | Ref                       | 182                | Ref                       | 307                 | Ref                       | 430                 | Ref                       |
| Yes                                  | 328                | 1.11 (0.88, 1.41)         | 543                | 1.05 (0.88, 1.26)         | 925                 | 1.04 (0.90, 1.20)         | 1089                | 0.94 (0.83, 1.07)         |
| 3rd trimester <sup>2</sup>           |                    |                           |                    |                           |                     |                           |                     |                           |
| No                                   | 113                | Ref                       | 224                | Ref                       | 336                 | Ref                       | 476                 | Ref                       |
| Yes                                  | 245                | 0.89 (0.70, 1.13)         | 394                | 0.76 (0.64, 0.91)         | 896                 | 1.11 (0.97, 1.28)         | 1043                | 1.01 (0.90, 1.14)         |

<sup>1</sup> Adjusted for birth year, maternal age, maternal education, maternal race, maternal birthplace and DDS regional center; <sup>2</sup> subjects with gestational age <26 weeks were excluded in the assessment of 3rd trimester exposure.
